# Supplementary material for: The stability of η2-H2borane complexes – a theoretical investigation
Source: Royal Society of Chemistry journal article supplement (doi:10.1039/c4dt00019f), 2014-01-01
Supplement: c4dt00019f1.pdf [file c4dt00019f1.pdf]

# Stability of $\eta^2$ -H<sub>2</sub> borane complexes – a theoretical investigation

László Könczöl, Gábor Turczel, Tamás Szpisjak, Dénes Szieberth\*

Department of Inorganic and Analytical Chemistry. Budapest University of Technology and Economics.  
Szt. Gellért tér 4.. H-1111 Budapest. Hungary. denes.szieberth@mail.bme.hu

## Cartesian coordinates:

Geometries for BH<sub>2</sub>R on the basis of  $\omega$ B97xD/aug-cc-pVTZ:

**R = H:**

Energy: -26.6085243

|   |           |           |          |
|---|-----------|-----------|----------|
| B | 0.000000  | 0.000016  | 0.000000 |
| H | -0.577480 | -1.042136 | 0.000000 |
| H | 1.191262  | 0.020871  | 0.000000 |
| H | -0.613782 | 1.021183  | 0.000000 |

**R = F:**

Energy: -125.9403003

|   |           |          |          |
|---|-----------|----------|----------|
| F | -0.012709 | 0.979913 | 0.177093 |
| B | 0.005903  | 1.657858 | 1.309584 |
| H | 0.093637  | 2.848135 | 1.246676 |
| H | -0.066073 | 1.041325 | 2.330915 |

**R = Cl:**

Energy: -486.2873196

|    |           |          |           |
|----|-----------|----------|-----------|
| Cl | -0.017466 | 0.817440 | -0.094358 |
| B  | 0.007692  | 1.712844 | 1.401477  |
| H  | 0.094922  | 2.895506 | 1.343858  |
| H  | -0.063388 | 1.104534 | 2.418593  |

**R = OH:**

Energy: -101.918348

|   |           |          |           |
|---|-----------|----------|-----------|
| O | -0.027873 | 0.953368 | 0.103271  |
| B | 0.003964  | 1.664447 | 1.251513  |
| H | 0.092892  | 2.860319 | 1.225446  |
| H | -0.060145 | 1.046990 | 2.271254  |
| H | 0.026317  | 1.493237 | -0.685470 |

**R = SH:**

Energy: -424.872246

|   |           |          |           |
|---|-----------|----------|-----------|
| S | -0.046306 | 0.672784 | -0.036299 |
| B | 0.005000  | 1.701163 | 1.409024  |
| H | 0.091411  | 2.882165 | 1.319027  |
| H | -0.051942 | 1.138175 | 2.454344  |
| H | 0.036991  | 1.624073 | -0.980082 |

**R = NH<sub>2</sub>:**

Energy: -82.0470692

|   |           |           |           |
|---|-----------|-----------|-----------|
| N | -0.017934 | 0.939822  | 0.109466  |
| B | 0.004476  | 1.652653  | 1.300763  |
| H | 0.080705  | 2.844285  | 1.260641  |
| H | -0.053071 | 1.055131  | 2.333749  |
| H | 0.027015  | 1.377348  | -0.793316 |
| H | -0.080586 | -0.061657 | 0.069734  |

**R = PH<sub>2</sub>:**

Energy: -368.590903

|   |           |           |           |
|---|-----------|-----------|-----------|
| B | 1.302016  | 0.000001  | 0.050532  |
| H | 1.892618  | 1.033524  | 0.023009  |
| H | 1.892617  | -1.033522 | 0.023012  |
| P | -0.555675 | 0.000001  | -0.111360 |
| H | -0.980385 | 1.081049  | 0.684717  |
| H | -0.980386 | -1.081042 | 0.684723  |

**R = P(O)H<sub>2</sub>:**

Energy: -443.81499

|   |           |           |           |
|---|-----------|-----------|-----------|
| B | 1.659517  | 0.390046  | -0.000057 |
| P | -0.134032 | -0.335108 | 0.000023  |
| H | 1.861831  | 1.559057  | 0.000269  |
| H | 2.547657  | -0.404350 | -0.000284 |
| H | -0.045880 | -1.264134 | -1.075898 |
| H | -0.045694 | -1.263760 | 1.076273  |
| O | -1.325627 | 0.556196  | -0.000053 |

**R = AsH<sub>2</sub>:**

Energy: -2263.204140

|    |           |           |           |
|----|-----------|-----------|-----------|
| B  | -1.642716 | 0.000000  | 0.049984  |
| H  | -2.234751 | -1.032155 | 0.009466  |
| H  | -2.234752 | 1.032154  | 0.009465  |
| As | 0.345624  | 0.000000  | -0.062162 |
| H  | 0.653243  | -1.134223 | 0.886394  |
| H  | 0.653243  | 1.134224  | 0.886392  |

**R = CH<sub>3</sub>:**

Energy: -65.945486

|   |           |           |           |
|---|-----------|-----------|-----------|
| B | -0.017900 | 0.871226  | 0.000000  |
| H | 0.014064  | 1.484744  | 1.026464  |
| H | 0.014064  | 1.484744  | -1.026464 |
| C | -0.018552 | -0.682851 | 0.000000  |
| H | -0.439906 | -1.140898 | 0.894013  |
| H | -0.439906 | -1.140898 | -0.894013 |
| H | 1.051147  | -0.947313 | 0.000000  |

**R = CF<sub>3</sub>:**

Energy: -363.702719

|   |           |          |          |
|---|-----------|----------|----------|
| B | -0.452497 | 1.566653 | 0.000000 |
| H | -0.570822 | 2.115492 | 1.044185 |

|   |           |           |           |
|---|-----------|-----------|-----------|
| H | -0.570822 | 2.115492  | -1.044185 |
| C | -0.044396 | 0.017536  | 0.000000  |
| F | -0.452902 | -0.672286 | -1.076429 |
| F | 1.312911  | -0.007857 | 0.000000  |
| F | -0.452902 | -0.672286 | 1.076429  |

**R = CCl<sub>3</sub>:**

Energy: -1444.779074

|    |           |           |           |
|----|-----------|-----------|-----------|
| B  | -0.570842 | 1.683803  | 0.000000  |
| H  | -0.709211 | 2.221490  | 1.048025  |
| H  | -0.709211 | 2.221490  | -1.048025 |
| C  | -0.264785 | 0.148458  | 0.000000  |
| Cl | -0.568116 | -0.797263 | -1.446046 |
| Cl | 1.484061  | 0.783118  | 0.000000  |
| Cl | -0.568116 | -0.797263 | 1.446046  |

**R = SiH<sub>3</sub>:**

Energy: -317.306749

|    |           |           |           |
|----|-----------|-----------|-----------|
| B  | -0.008861 | 1.442651  | 0.000000  |
| H  | 0.018870  | 2.061412  | 1.019905  |
| H  | 0.018870  | 2.061412  | -1.019905 |
| Si | -0.009222 | -0.573626 | 0.000000  |
| H  | -0.647003 | -1.162402 | 1.206205  |
| H  | -0.647003 | -1.162402 | -1.206205 |
| H  | 1.425604  | -0.981932 | 0.000000  |

**R = SiF<sub>3</sub>:**

Energy: -615.286437

|    |           |           |           |
|----|-----------|-----------|-----------|
| B  | -0.545301 | 1.952931  | 0.000000  |
| H  | -0.693644 | 2.535630  | 1.025864  |
| H  | -0.693644 | 2.535630  | -1.025864 |
| Si | -0.015750 | 0.013123  | 0.000000  |
| F  | -0.545682 | -0.782325 | -1.271604 |
| F  | 1.572571  | -0.104238 | 0.000000  |
| F  | -0.545682 | -0.782325 | 1.271604  |

Geometries for  $\eta^2\text{-H}_2\text{BH}_2\text{R}$  on the basis of  $\omega\text{B97xD/aug-cc-pVTZ}$ :

**R = H, optimum:**

Energy: -27.7966144

|   |           |           |           |
|---|-----------|-----------|-----------|
| B | -0.630632 | -1.044205 | -0.825731 |
| H | 0.008130  | -0.202083 | -0.268262 |
| H | -0.333777 | -2.178489 | -0.547443 |
| H | -1.788230 | -0.867314 | -1.063696 |
| H | -0.200265 | -0.672353 | -2.108575 |
| H | 0.028690  | -1.444437 | -1.979617 |

**R = H, TS<sub>ROT</sub>:**

Energy: -27.7965312

|   |           |           |           |
|---|-----------|-----------|-----------|
| H | -0.545155 | -0.000002 | 1.142496  |
| B | -0.201309 | -0.000007 | -0.000453 |
| H | -0.341228 | 1.006169  | -0.639302 |

|   |           |           |           |
|---|-----------|-----------|-----------|
| H | -0.341245 | -1.006167 | -0.639321 |
| H | 1.139780  | 0.405489  | 0.076655  |
| H | 1.139788  | -0.405480 | 0.076701  |

**R = PH<sub>2</sub>:**

Energy: -369.763715156

|   |           |           |           |
|---|-----------|-----------|-----------|
| B | 0.000000  | 0.000000  | 0.000000  |
| P | 0.000000  | 0.000000  | 1.961146  |
| H | 1.110321  | 0.000000  | -0.468013 |
| H | -0.799051 | -0.597962 | -0.656624 |
| H | 0.109506  | 1.309555  | -0.510032 |
| H | -0.650959 | 1.244020  | -0.235384 |
| H | -1.202797 | -0.715220 | 2.173832  |
| H | 0.826692  | -1.141779 | 2.078129  |

**R = P(O)H<sub>2</sub>:**

Energy: -445.008422312

|   |           |           |          |
|---|-----------|-----------|----------|
| O | 0.000000  | 0.000000  | 0.000000 |
| P | 0.000000  | 0.000000  | 1.494639 |
| B | 1.754581  | 0.000000  | 2.326762 |
| H | 2.345814  | 1.008234  | 2.048615 |
| H | 1.919392  | -0.406165 | 3.435373 |
| H | 2.688810  | -0.470924 | 1.446887 |
| H | 2.212107  | -1.113222 | 1.660435 |
| H | -0.738549 | -1.057311 | 2.086176 |
| H | -0.651527 | 1.095613  | 2.119057 |

**R = CH<sub>3</sub>:**

Energy: -67.122430

|   |           |           |           |
|---|-----------|-----------|-----------|
| B | -0.801152 | -1.078709 | -0.844301 |
| H | -0.173971 | -0.251682 | -0.233095 |
| H | -0.443271 | -2.204293 | -0.607897 |
| C | -2.327617 | -0.800604 | -1.196481 |
| H | -0.006115 | -0.561220 | -1.992571 |
| H | -0.112170 | -1.331840 | -2.140273 |
| H | -2.517225 | 0.206485  | -1.571030 |
| H | -2.754748 | -1.515532 | -1.901393 |
| H | -2.898051 | -0.899852 | -0.268982 |

**R = CF<sub>3</sub>:**

Energy: -364.893518284

|   |           |           |           |
|---|-----------|-----------|-----------|
| C | 0.000000  | 0.000000  | 0.000000  |
| F | 0.000000  | 0.000000  | 1.354011  |
| B | 1.478257  | 0.000000  | -0.637280 |
| F | -0.741428 | 1.072277  | -0.365849 |
| F | -0.685293 | -1.091520 | -0.385119 |
| H | 2.246390  | -0.805188 | -0.203335 |
| H | 1.552547  | 0.198261  | -1.812797 |
| H | 2.172844  | 0.927187  | 0.151613  |
| H | 1.893401  | 1.331283  | -0.496473 |

**R = CCl<sub>3</sub>:**

Energy: -1445.961057659

|    |           |           |           |
|----|-----------|-----------|-----------|
| C  | 0.000000  | 0.000000  | 0.000000  |
| Cl | 0.000000  | 0.000000  | 1.792592  |
| B  | 1.493343  | 0.000000  | -0.602350 |
| Cl | -0.947128 | 1.416941  | -0.555352 |
| Cl | -0.786848 | -1.491948 | -0.582960 |
| H  | 2.253526  | -0.793364 | -0.133657 |
| H  | 1.590882  | 0.198047  | -1.776344 |
| H  | 2.175612  | 0.968314  | 0.203362  |
| H  | 1.913645  | 1.360727  | -0.447274 |

**R = SiH<sub>3</sub>:**

Energy: -318.501085790

|    |           |           |           |
|----|-----------|-----------|-----------|
| B  | 0.000000  | 0.000000  | 0.000000  |
| Si | 0.000000  | 0.000000  | 2.030432  |
| H  | 1.116078  | 0.000000  | -0.426256 |
| H  | -0.818384 | -0.758867 | -0.426256 |
| H  | -0.411325 | 1.048553  | -0.706829 |
| H  | -0.476683 | 1.215165  | 0.151007  |
| H  | -1.354255 | 0.170530  | 2.620985  |
| H  | 0.520334  | -1.326373 | 2.445638  |
| H  | 0.877081  | 1.045858  | 2.620986  |

**R = SiF<sub>3</sub>:**

Energy: -616.485248250

|    |           |           |           |
|----|-----------|-----------|-----------|
| B  | 1.913395  | 0.231523  | 0.014428  |
| H  | 2.275263  | 0.669758  | -1.035180 |
| H  | 2.289716  | 0.711013  | 1.039233  |
| Si | -0.061271 | 0.010677  | 0.001396  |
| H  | 2.758802  | -0.796619 | -0.003062 |
| H  | 1.951607  | -1.094214 | 0.050698  |
| F  | -0.643815 | -0.740474 | 1.280843  |
| F  | -0.743839 | 1.444991  | -0.036219 |
| F  | -0.610631 | -0.793076 | -1.260555 |

Geometries for **BHR<sub>2</sub>** on the basis of  $\omega$ B97xD/aug-cc-pVTZ:

**R = SiH<sub>3</sub>:**

Energy: -608.007494

|    |           |           |           |
|----|-----------|-----------|-----------|
| Si | 0.018205  | -0.580111 | -0.013731 |
| B  | 0.031597  | 1.433510  | -0.001533 |
| Si | 0.045522  | 2.492455  | 1.711194  |
| H  | 0.031259  | 2.018153  | -1.042951 |
| H  | -0.583902 | -1.161038 | 1.214800  |
| H  | -0.648510 | -1.180224 | -1.197799 |
| H  | 1.456897  | -0.976231 | -0.041622 |
| H  | 0.711804  | 3.816011  | 1.606653  |
| H  | -1.393080 | 2.722112  | 2.035548  |
| H  | 0.648393  | 1.746284  | 2.846568  |

**R = SiF<sub>3</sub>:**

Energy: -1203.963675

|    |           |           |           |
|----|-----------|-----------|-----------|
| Si | 0.095333  | 0.010768  | -0.023673 |
| F  | -0.224736 | -0.845426 | 1.273794  |
| B  | -0.754304 | 1.828457  | 0.051266  |
| F  | -0.364770 | -0.859338 | -1.267925 |
| F  | 1.669965  | 0.198193  | -0.124788 |
| Si | -0.807240 | 2.947168  | 1.718980  |
| H  | -1.245992 | 2.282463  | -0.931564 |
| F  | -0.525184 | 4.479113  | 1.414620  |
| F  | -2.252110 | 2.829946  | 2.368513  |
| F  | 0.251726  | 2.497130  | 2.811615  |

Geometries for  $\eta^2\text{-H}_2\text{ BHR}_2$  on the basis of  $\omega\text{B97xD/aug-cc-pVTZ}$ :

**R = SiH<sub>3</sub>:**

Energy: -609.207008

|    |           |           |           |
|----|-----------|-----------|-----------|
| B  | -0.031990 | 0.021482  | -0.005306 |
| Si | 0.022759  | 0.038290  | 2.016175  |
| Si | 1.916139  | -0.031344 | -0.557284 |
| H  | -0.729779 | -0.782755 | -0.543974 |
| H  | -0.074975 | 1.097061  | -0.683847 |
| H  | -0.698063 | 1.105512  | 0.057245  |
| H  | -1.325226 | -0.106718 | 2.624644  |
| H  | 0.857959  | -1.099465 | 2.481612  |
| H  | 0.625274  | 1.295469  | 2.535432  |
| H  | 2.123040  | 0.146311  | -2.018656 |
| H  | 2.724336  | 1.003161  | 0.141975  |
| H  | 2.433678  | -1.369961 | -0.178729 |

**R = SiF<sub>3</sub>:**

Energy: -1205.171774

|    |           |           |           |
|----|-----------|-----------|-----------|
| B  | 0.004853  | 0.014112  | -0.004202 |
| Si | 0.021248  | 0.006634  | 1.985861  |
| F  | 1.481021  | 0.027516  | 2.609771  |
| F  | -0.752292 | 1.247654  | 2.610420  |
| F  | -0.710913 | -1.301894 | 2.493634  |
| Si | 1.373638  | -1.260559 | -0.681525 |
| H  | -1.103593 | -0.094623 | -0.424294 |
| H  | 0.535375  | 0.955660  | -0.716352 |
| H  | 0.277085  | 1.275096  | 0.094795  |
| F  | 1.099057  | -1.686547 | -2.186423 |
| F  | 2.834338  | -0.632425 | -0.642088 |
| F  | 1.402204  | -2.596879 | 0.172619  |

Geometries for **pentavalent H<sub>2</sub>/BHR<sub>2</sub>** on the basis of  $\omega\text{B97xD/aug-cc-pVTZ}$ :

**R = SiH<sub>3</sub>:**

Energy: -609.224278

|    |           |           |           |
|----|-----------|-----------|-----------|
| B  | 0.031021  | -0.313962 | -0.021356 |
| H  | -0.200997 | -1.490488 | 0.073086  |
| H  | -0.283874 | 0.206498  | -1.078029 |
| Si | -1.964781 | 0.061016  | 0.007944  |

|    |           |           |           |
|----|-----------|-----------|-----------|
| Si | 1.997703  | 0.054772  | 0.004397  |
| H  | 2.666921  | -0.620918 | -1.136422 |
| H  | -2.595963 | -0.649041 | -1.127950 |
| H  | -2.556758 | -0.453832 | 1.264604  |
| H  | 2.609810  | -0.444156 | 1.262427  |
| H  | 2.269876  | 1.512196  | -0.096022 |
| H  | -2.235862 | 1.512207  | -0.105212 |
| H  | -0.290942 | 0.358071  | 0.949291  |

**R = SiF<sub>3</sub>:**

Energy: -1205.190481

|    |           |           |           |
|----|-----------|-----------|-----------|
| B  | -0.002533 | -0.008619 | -0.018649 |
| Si | -1.957818 | -0.000320 | -0.000033 |
| Si | 1.933331  | 0.000341  | 0.003007  |
| H  | 0.336677  | 0.171997  | -1.174036 |
| H  | 0.334052  | 0.903859  | 0.716770  |
| H  | 0.336008  | -1.099513 | 0.405642  |
| F  | 2.514489  | 1.372166  | -0.522921 |
| F  | 2.501662  | -0.222828 | 1.460096  |
| F  | 2.528836  | -1.141679 | -0.912162 |
| F  | -2.554908 | -1.147973 | -0.915829 |
| F  | -2.522163 | -0.220985 | 1.464449  |
| F  | -2.536557 | 1.377517  | -0.528287 |

Geometries for **BR<sub>3</sub>** on the basis of  $\omega$ B97xD/aug-cc-pVTZ:

**R = SiH<sub>3</sub>:**

Energy: -898.710902

|    |           |           |           |
|----|-----------|-----------|-----------|
| B  | 0.023402  | -0.007325 | -0.048991 |
| Si | 0.946441  | 1.766016  | -0.257861 |
| Si | 1.052549  | -1.720913 | 0.160563  |
| Si | -1.983512 | -0.052621 | 0.048119  |
| H  | 2.300171  | 1.692467  | -0.866952 |
| H  | 0.275200  | -2.926720 | -0.230883 |
| H  | -2.597546 | 1.217197  | 0.518407  |
| H  | 0.135103  | 2.749505  | -1.023925 |
| H  | 2.353335  | -1.741412 | -0.558417 |
| H  | -2.406400 | -0.272892 | -1.366780 |
| H  | 1.090433  | 2.280730  | 1.135696  |
| H  | 1.330076  | -1.811617 | 1.624445  |
| H  | -2.519345 | -1.172370 | 0.866579  |

**R = SiF<sub>3</sub>:**

Energy: -1792.642194

|    |           |          |           |
|----|-----------|----------|-----------|
| B  | -0.001063 | 0.011235 | -0.000842 |
| Si | 0.008540  | 0.011222 | 2.006639  |
| Si | 1.734386  | 0.011175 | -1.009865 |
| Si | -1.743579 | 0.011308 | -0.997433 |
| F  | 1.460300  | 0.011158 | 2.640424  |
| F  | 1.562105  | 0.011183 | -2.584571 |
| F  | -3.019391 | 0.011377 | -0.058608 |

|   |           |           |           |
|---|-----------|-----------|-----------|
| F | -0.740529 | 1.304321  | 2.535315  |
| F | 2.565345  | 1.304366  | -0.622647 |
| F | -1.825308 | 1.304435  | -1.910545 |
| F | -0.740637 | -1.281820 | 2.535299  |
| F | 2.565256  | -1.282074 | -0.622651 |
| F | -1.825425 | -1.281833 | -1.910516 |

Geometry for  $\eta^2\text{-H}_2\text{BR}_3$  on the basis of  $\omega\text{B97xD/aug-cc-pVTZ}$ :

**R = SiF<sub>3</sub>:**

Energy: -1793.856502

|    |           |           |           |
|----|-----------|-----------|-----------|
| B  | 0.010286  | -0.125855 | 0.053058  |
| Si | -0.151331 | 0.051369  | 2.029703  |
| F  | 1.286317  | 0.028380  | 2.696886  |
| Si | 1.493845  | -1.237289 | -0.682166 |
| F  | 2.829080  | -0.399700 | -0.834997 |
| F  | 1.815148  | -2.469291 | 0.262805  |
| F  | 1.111953  | -1.828131 | -2.105763 |
| F  | -0.865184 | 1.395838  | 2.482522  |
| F  | -0.997500 | -1.142468 | 2.650858  |
| Si | 0.130253  | 1.657531  | -0.837957 |
| H  | -1.114292 | -0.166177 | -0.554135 |
| H  | -0.870177 | -1.010161 | -0.224018 |
| F  | -1.234306 | 2.461199  | -0.777538 |
| F  | 1.235474  | 2.500615  | -0.087839 |
| F  | 0.530500  | 1.547617  | -2.366393 |

Geometries for **pentavalent H<sub>2</sub>/BR<sub>23</sub>** on the basis of  $\omega\text{B97xD/aug-cc-pVTZ}$ :

**R = SiH<sub>3</sub>:**

Energy: -899.932758

|    |           |           |           |
|----|-----------|-----------|-----------|
| B  | 0.587399  | 0.034959  | 0.126500  |
| Si | -0.474449 | -0.053825 | 1.838314  |
| Si | 2.102248  | 0.051600  | -1.204165 |
| Si | -0.112777 | 1.874995  | -0.402729 |
| H  | 0.082348  | -0.957011 | -0.335607 |
| H  | 1.503195  | -0.190895 | 0.894269  |
| H  | 1.586518  | 0.362668  | -2.560926 |
| H  | 3.130227  | 1.055564  | -0.843700 |
| H  | 2.724497  | -1.293061 | -1.226046 |
| H  | 0.016409  | 0.928172  | 2.832981  |
| H  | -1.907601 | 0.219695  | 1.564813  |
| H  | -0.347262 | -1.418739 | 2.401004  |
| H  | -1.225403 | 1.634113  | -1.353390 |
| H  | -0.634187 | 2.659678  | 0.748528  |
| H  | 0.909032  | 2.722824  | -1.073608 |

**R = SiF<sub>3</sub>:**

Energy: -1793.873196

|    |           |          |           |
|----|-----------|----------|-----------|
| B  | 0.615673  | 0.338696 | 0.161037  |
| Si | -0.151485 | 2.079511 | -0.429017 |



|    |           |           |           |
|----|-----------|-----------|-----------|
| Si | -0.402664 | -0.190435 | 1.765580  |
| Si | 2.046539  | -0.091532 | -1.127015 |
| H  | 0.163519  | -0.708082 | -0.257627 |
| H  | 1.539513  | 0.199655  | 0.938490  |
| F  | 1.506692  | -0.006453 | -2.607939 |
| F  | 3.272663  | 0.891611  | -0.991360 |
| F  | 2.576810  | -1.558179 | -0.874915 |
| F  | -0.099229 | 0.755442  | 2.990978  |
| F  | -1.954509 | -0.146211 | 1.479863  |
| F  | -0.017037 | -1.662926 | 2.188492  |
| F  | -1.335571 | 1.799685  | -1.441158 |
| F  | -0.731872 | 2.931808  | 0.775657  |
| F  | 0.911151  | 2.998145  | -1.164828 |
